# Supplementary material for: Non-ultraviolet photocatalytic kinetics of NaYF4:Yb,Tm@TiO2/Ag core@comby shell nanostructures
Source: Royal Society of Chemistry journal article supplement (doi:10.1039/c5ta03143e), 2015-01-01
Supplement: c5ta03143e1.pdf [file c5ta03143e1.pdf]

## Supporting information

*Non-Ultraviolet Photocatalytic Kinetics on NaYF<sub>4</sub>:Yb,Tm@TiO<sub>2</sub>/Ag Core@Comby*

*Shell Nanostructures*

*Yongmei Ma, Honglin Liu,\* Zhenzhen Han, Liangbao Yang,\* and Jinhuai Liu*

*Institute of Intelligent Machines, Chinese Academy of Sciences, Hefei 230031, China.*

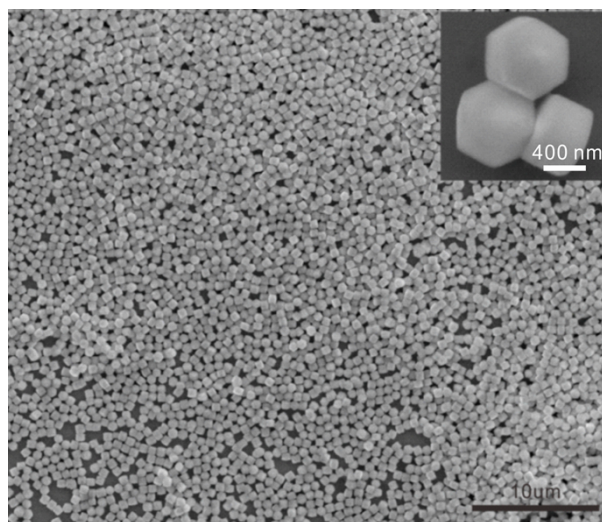

Fig. S1 SEM image of UC NCs (inset: TEM image of UC NCs).

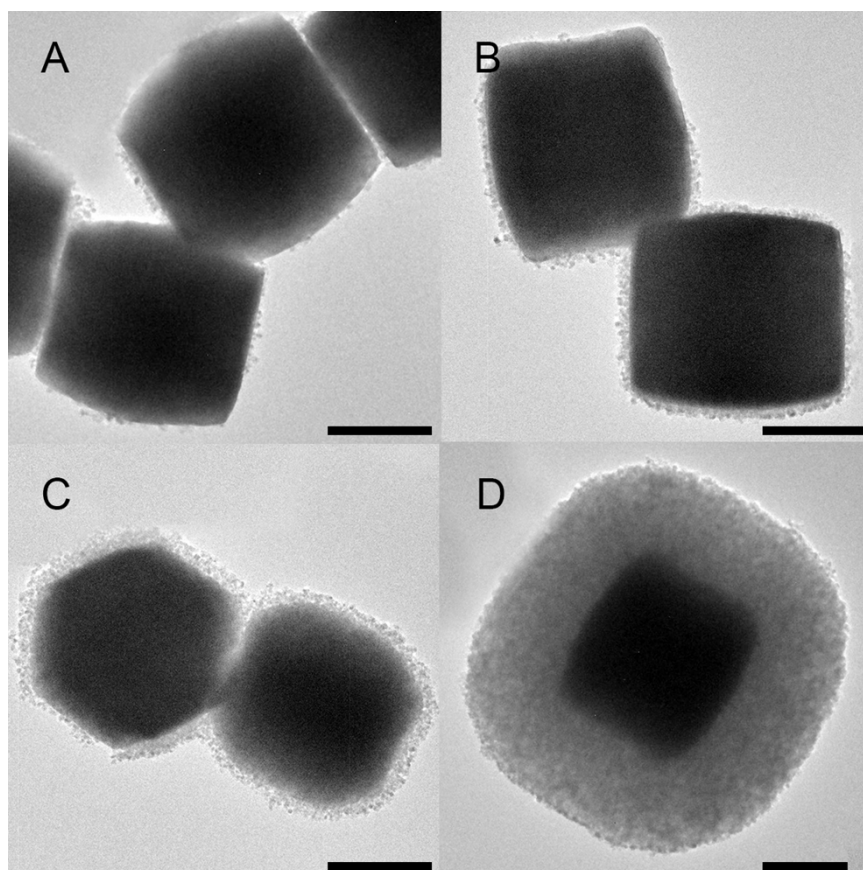

Fig. S2. The different thickness of  $\text{TiO}_2$  by adjusting the amount of  $\text{Ti}(\text{O}i\text{Bu})_4$ .

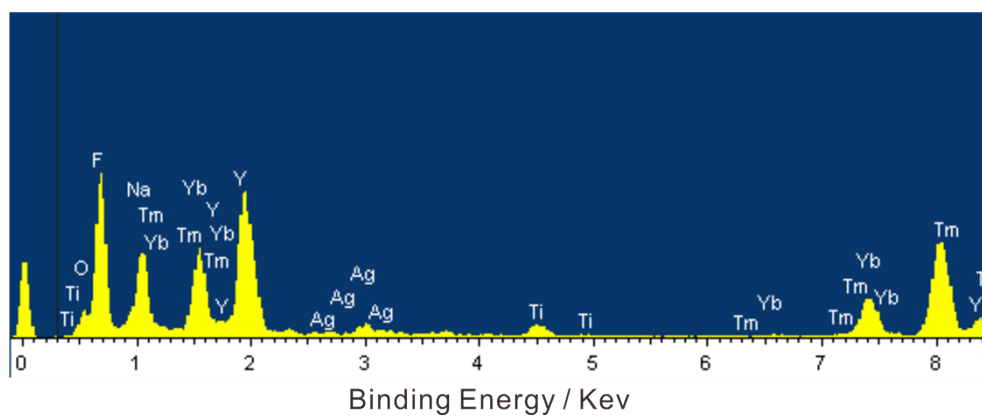

Fig. S3. EDS spectrum of the  $\text{UC@TiO}_2\text{@Ag}$  NCs.

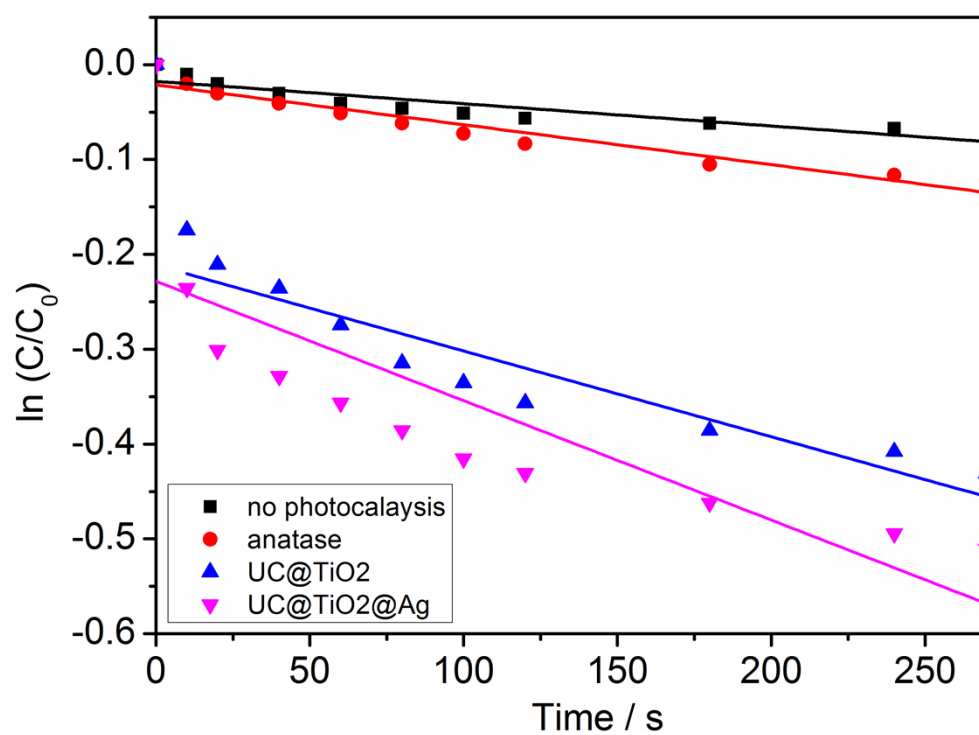

Fig. S4. Comparison of first-order degradation rates for R6G degradation for different photocatalysts under Xe lamp eliminate UV band.
